# Supplementary material for: Optical, Dielectric and Magnetic Properties of La<sub>1-x</sub>Nd<sub>x</sub>FeO<sub>3</sub> Powders and Ceramics
Source: Preprints.org preprint supplement (doi:10.20944/preprints201811.0411.v1), 2018-11-19
Supplement: Supplementary file 1 [file supplementary]

## Supplementary

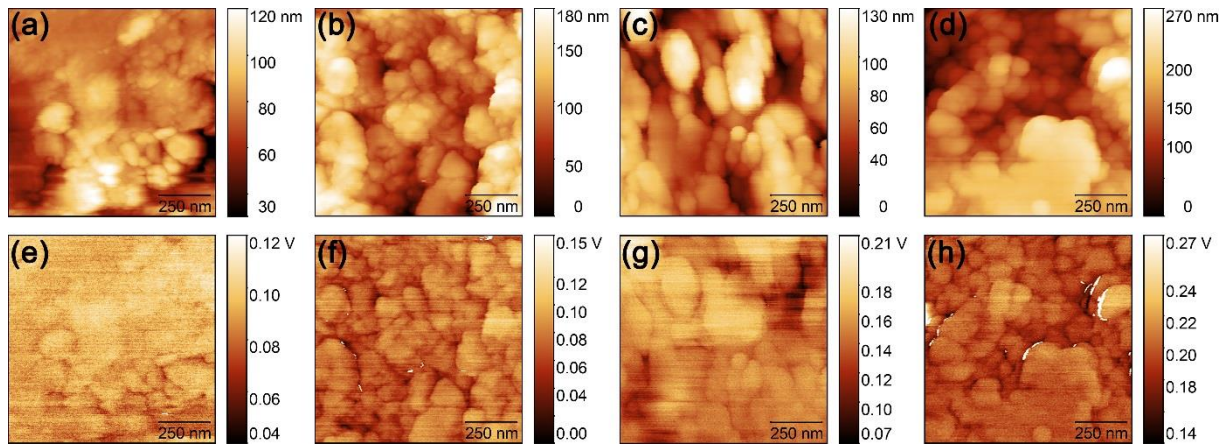

Figure s1. (a)-(d) Topography and (e)-(h) surface potential of  $\text{La}_{1-x}\text{Nd}_x\text{FeO}_3$  in dependence of Nd doping degree. (a), (e) 0.5%; (b), (f) 1%; (c), (g) 5%; (d), (h) 10%.
